# Supplementary material
Source: Frontiers journal article supplement (https://www.frontiersin.org/articles/451241)
Supplement: Data_Sheet_2.PDF [file Data_Sheet_2.PDF]

## *Supplementary Material*

### **Image processing examples for Senescence, Septoria Tritici Blotch Severity and Canopy Cover**

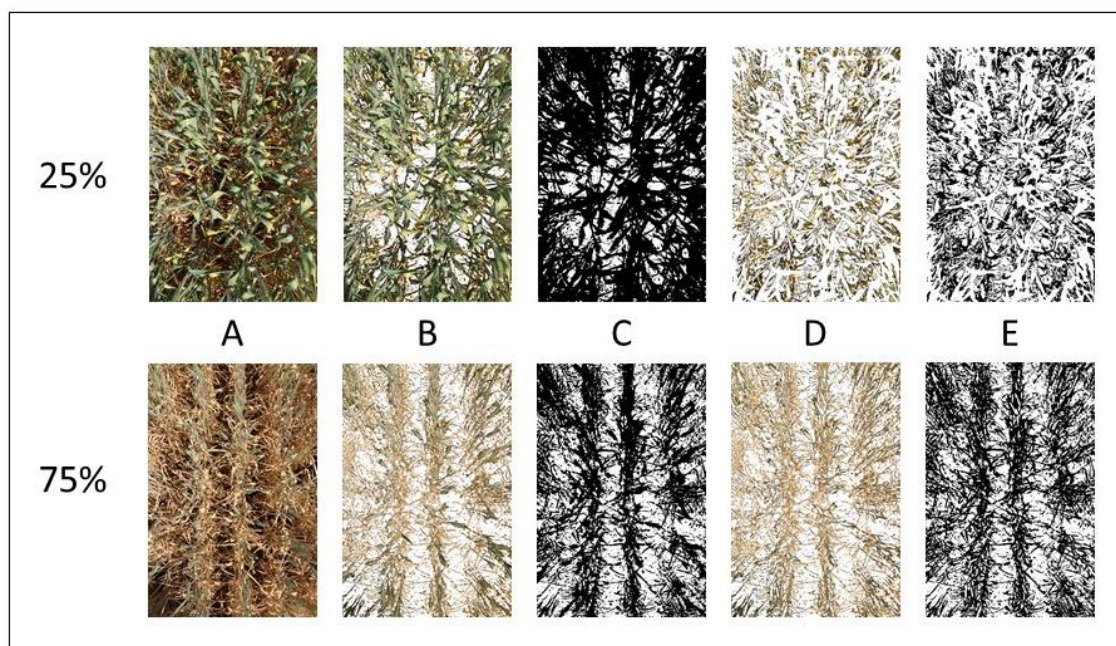

**Supplementary Figure 1.** Examples of images processed for the assessment of senescence, showing the original image (A), segmented plant material (B), binary plant material threshold (C), segmented senesced material (D) and binary senesced material threshold (E), for plots with scored approximately **25%** and **75%** yellow leaf area.

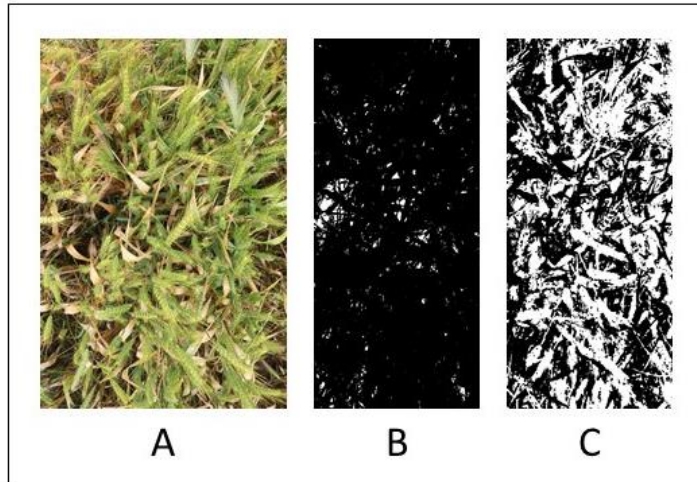

**Supplementary Figure 2.** Examples of images processed for *Septoria tritici* blotch assessment, showing (A) original image, (B) binary plant material threshold and (C) binary *Septoria tritici* blotch material threshold.

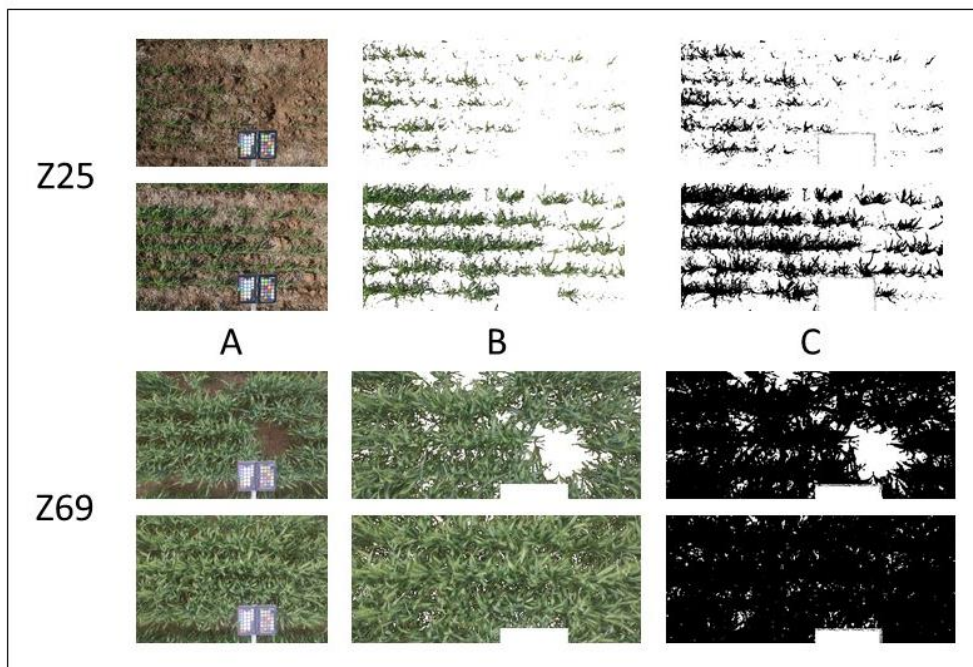

**Supplementary Figure 3.** Examples of images processed for canopy cover assessment, showing (A) original image, (B) segmented plant material and (C) binary plant material threshold, for plots at Zadoks growth scale 25 (top) and 69 (bottom).
